# Supplementary material for: Formulation engineering for optimizing ternary electron acceptors exemplified by isomeric PC71BM in planar perovskite solar cells
Source: Royal Society of Chemistry journal article supplement (doi:10.1039/c6ta07750a), 2016-01-01
Supplement: c6ta07750a1.pdf [file c6ta07750a1.pdf]

**$\alpha$ -PC<sub>71</sub>BM:** <sup>1</sup>H NMR (500MHz, CDCl<sub>3</sub>)  $\delta$ : 7.902 (s, 2H), 7.522 (t, <sup>3</sup>J = 7.5Hz, 2H), 7.448-7.414 (m, 1H), 3.674 (s, 3H), 2.499-2.427 (m, 4H), 2.219-2.046 (m, 2H). <sup>13</sup>C NMR (125 MHz, CDCl<sub>3</sub>)  $\delta$ : 173.36, 156.01, 155.31, 152.20, 151.97, 151.53, 151.25, 151.18, 150.93, 150.88, 150.63, 150.57, 149.48, 149.44, 149.25, 149.23, 149.18, 149.16, 148.63, 148.61, 148.57, 148.47, 148.36, 148.07, 147.95, 147.61, 147.57, 147.48, 147.41, 147.08, 146.36, 145.97, 145.87, 145.85, 145.70, 144.94, 144.55, 144.13, 143.97, 143.92, 143.79, 143.68, 143.38, 143.29, 142.69, 142.55, 141.76, 141.64, 141.46, 140.99, 140.19, 139.34, 138.95, 137.97, 137.34, 134.05, 133.89, 132.86, 131.61, 130.95, 130.81, 130.79, 130.70, 130.47, 128.57, 128.24, 71.98, 69.90, 51.68, 35.94, 34.16, 33.84, 21.75; APCI-MS: M<sup>+</sup> = 1030.2 m/z (calcd. 1030.1).

**$\beta$ <sub>1</sub>-PC<sub>71</sub>BM:** <sup>1</sup>H NMR (500MHz, CDCl<sub>3</sub>/CS<sub>2</sub>)  $\delta$ : 7.772 (d, <sup>3</sup>J = 7.0Hz, 2H), 7.562 (t, <sup>3</sup>J = 7.5Hz, 2H), 7.501 (t, <sup>3</sup>J = 7.5Hz, 1H), 3.512 (s, 3H), 2.180 (t, <sup>3</sup>J = 7.0Hz, 2H), 2.118-2.085 (m, 2H), 1.825-1.764 (m, 2H). <sup>13</sup>C NMR (125 MHz, CDCl<sub>3</sub>/CS<sub>2</sub>)  $\delta$ : 171.98, 152.97, 151.19, 149.70, 149.54, 149.41, 149.19, 149.01, 148.91, 148.29, 148.28, 147.97, 147.89, 147.00, 146.97, 146.88, 146.69, 146.62, 146.04, 145.71, 145.64, 145.32, 145.13, 144.61, 144.31, 143.96, 142.91, 142.59, 142.49, 142.26, 141.60, 139.46, 137.81, 132.30, 131.97, 131.62, 131.44, 131.02, 128.47, 128.15, 127.65, 65.13, 51.03, 37.27, 33.34, 33.28, 21.67 ; APCI-MS: M<sup>+</sup> = 1030.1 m/z (calcd. 1030.1).

**$\beta$ <sub>2</sub>-PC<sub>71</sub>BM:** <sup>1</sup>H NMR (500MHz, CDCl<sub>3</sub>)  $\delta$ : 7.417-7.398 (m, 2H), 7.236-7.180 (m, 3H), 3.745 (s, 3H), 2.520-2.442 (m, 4H), 2.048-1.985 (m, 2H). <sup>13</sup>C NMR (125 MHz, CDCl<sub>3</sub>)  $\delta$ : 173.44, 153.23, 151.23, 150.01, 149.70, 149.58, 149.51, 149.37, 148.88, 148.67, 148.33, 148.27, 147.96, 147.20, 147.12, 147.03, 146.83, 146.59, 145.86, 145.50, 144.90, 144.59, 144.57, 144.52, 144.16, 143.55, 143.13, 142.69, 141.79, 141.53, 141.51, 141.35, 136.74, 132.25, 132.24, 131.88, 131.52, 131.23, 128.23, 127.92, 127.04, 65.65, 51.75, 37.87, 35.27, 33.87, 22.11; APCI-MS: M<sup>+</sup> = 1030.1 m/z (calcd. 1030.1).

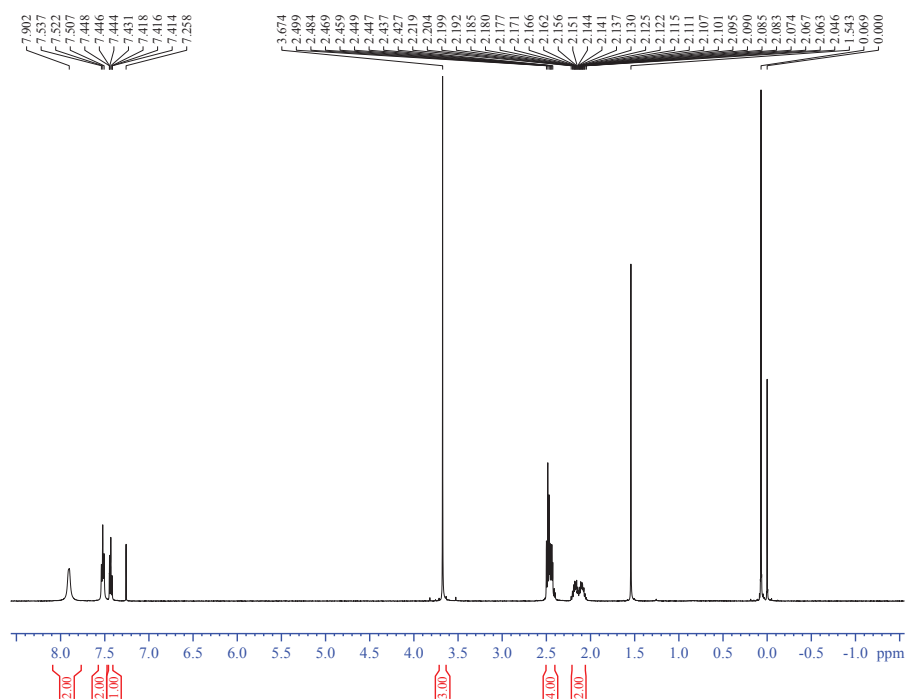

Fig. S1.  $^1\text{H}$  NMR spectrum of  $\alpha\text{-PC}_{71}\text{BM}$  in chloroform-d.

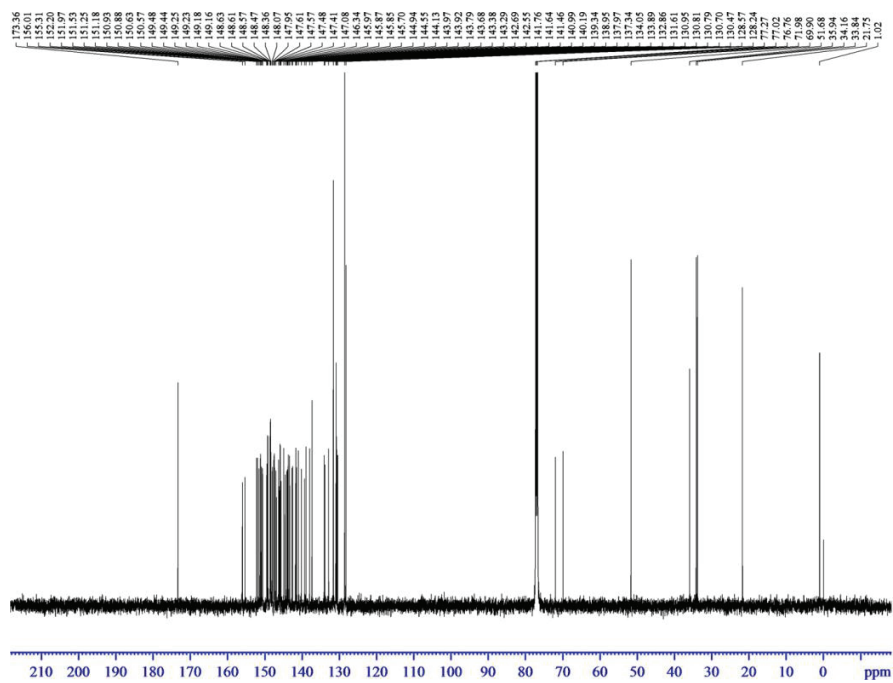

Fig. S2.  $^{13}\text{C}$  NMR spectrum of  $\alpha\text{-PC}_{71}\text{BM}$  in chloroform-d.

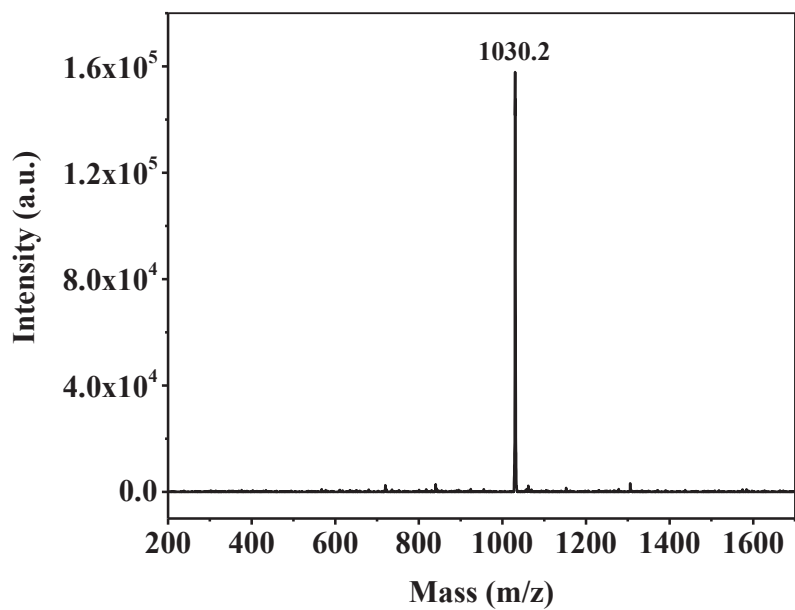

Fig. S3. APCI-MS spectrum of  $\alpha$ -PC<sub>71</sub>BM.

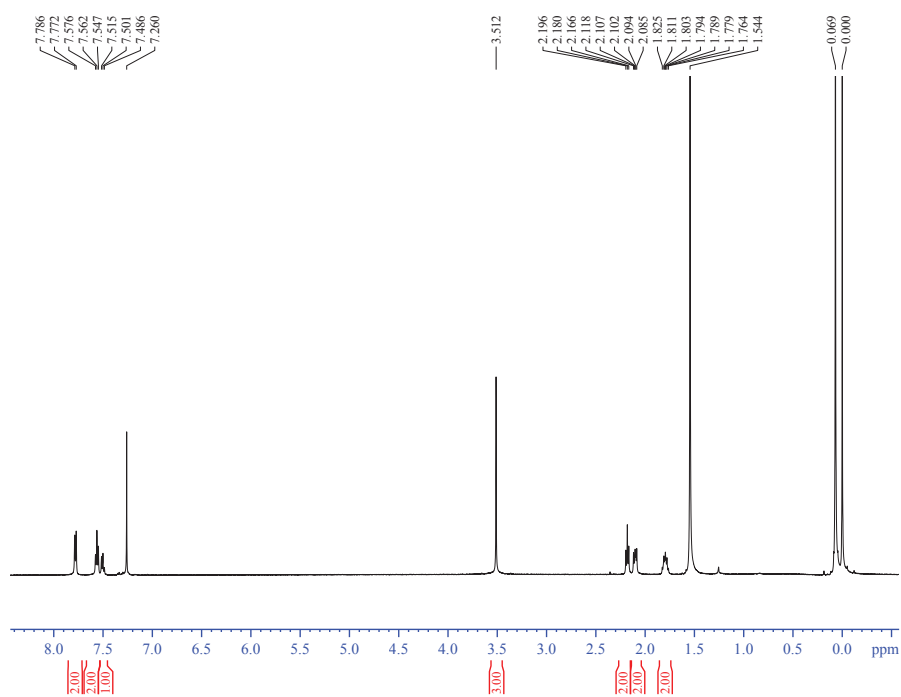

Fig. S4. <sup>1</sup>H NMR spectrum of  $\beta_1$ -PC<sub>71</sub>BM in chloroform-d and CS<sub>2</sub>.

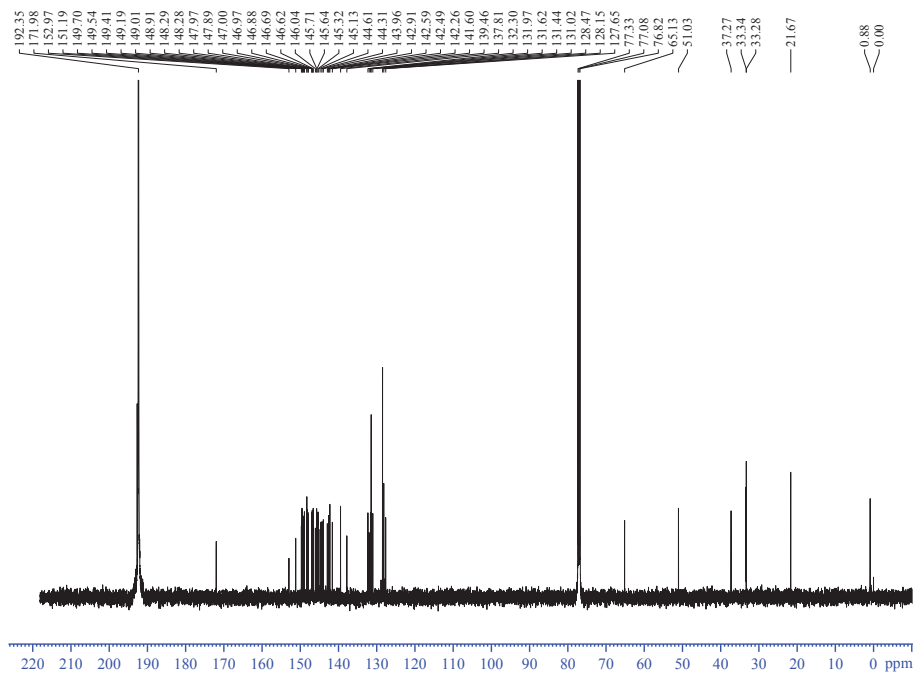

Fig. S5.  $^{13}\text{C}$  NMR spectrum of  $\beta_1\text{-PC}_{71}\text{BM}$  chloroform- $d$  and  $\text{CS}_2$ .

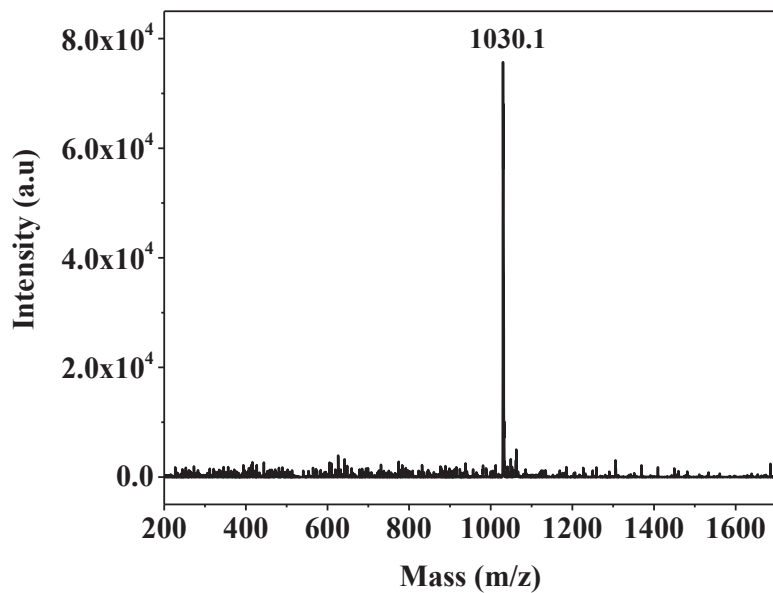

Fig. S6. APCI-MS spectrum of  $\beta_1\text{-PC}_{71}\text{BM}$ .

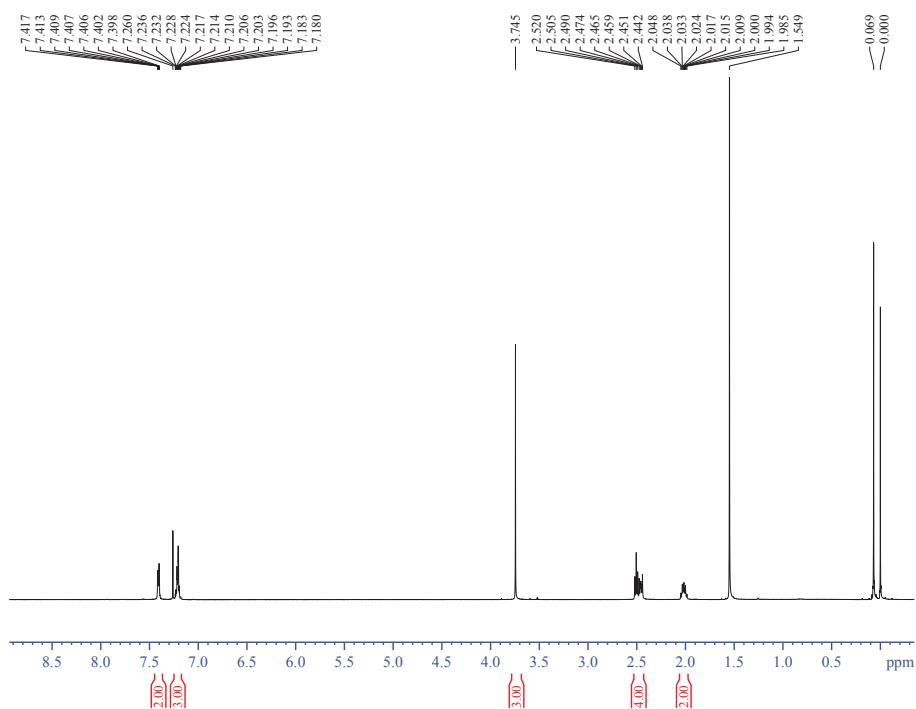

Fig. S7.  $^1\text{H}$  NMR spectrum of  $\beta_2\text{-PC}_{71}\text{BM}$  in chloroform-d.

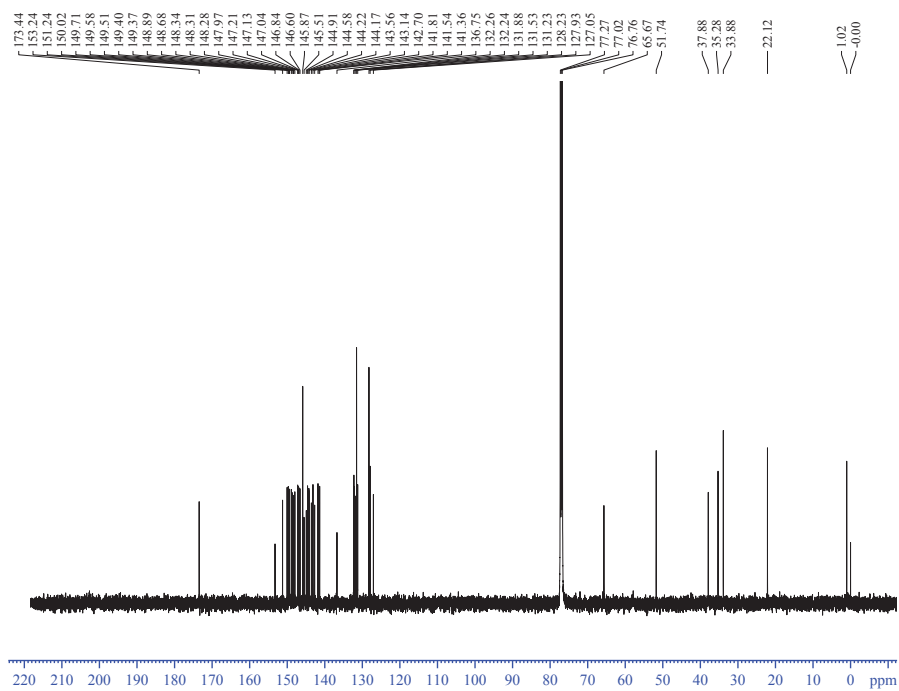

Fig. S8.  $^{13}\text{C}$  NMR spectrum of  $\beta_2\text{-PC}_{71}\text{BM}$  chloroform-d.

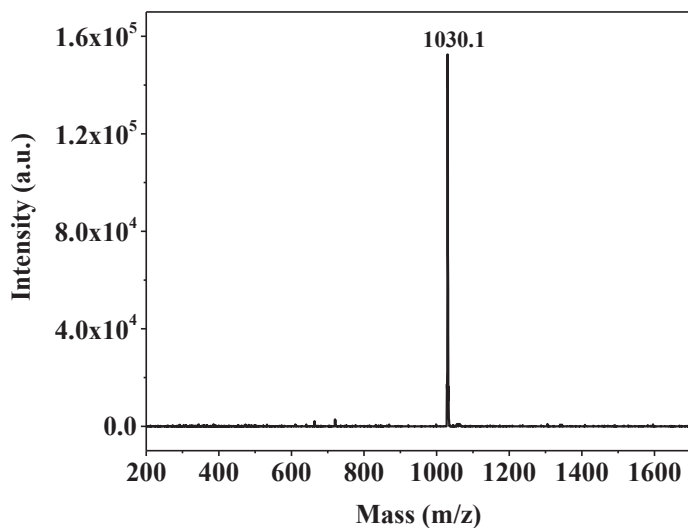

Fig. S9. APCI-MS spectrum of  $\beta_2\text{-PC}_{71}\text{BM}$ .

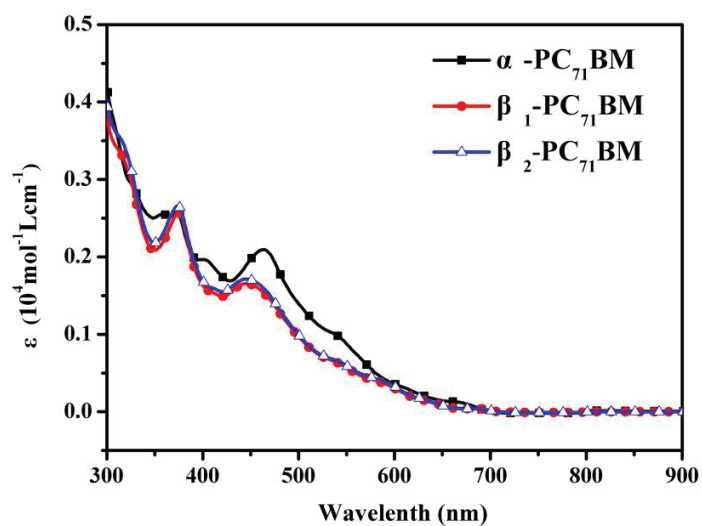

Fig. S10. UV-vis spectra of  $\alpha\text{-PC}_{71}\text{BM}$ ,  $\beta_1\text{-PC}_{71}\text{BM}$  and  $\beta_2\text{-PC}_{71}\text{BM}$  in toluene solutions ( $10^{-5}$  mol/L).

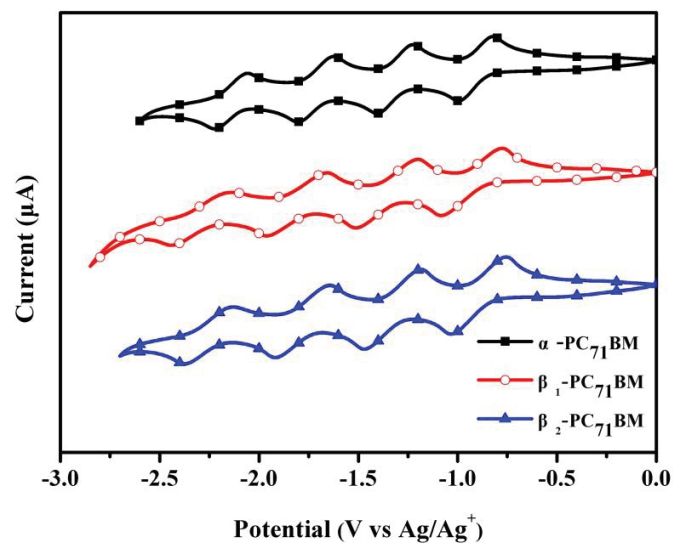

Fig. S11. Cyclic voltammograms of  $\alpha$ -PC<sub>71</sub>BM,  $\beta_1$ -PC<sub>71</sub>BM and  $\beta_2$ -PC<sub>71</sub>BM in a mixed solution of *o*-dichlorobenzene/acetonitrile (5:1) with 0.1 M Bu<sub>4</sub>NPF<sub>6</sub> at a scan rate of 100 mV/s.

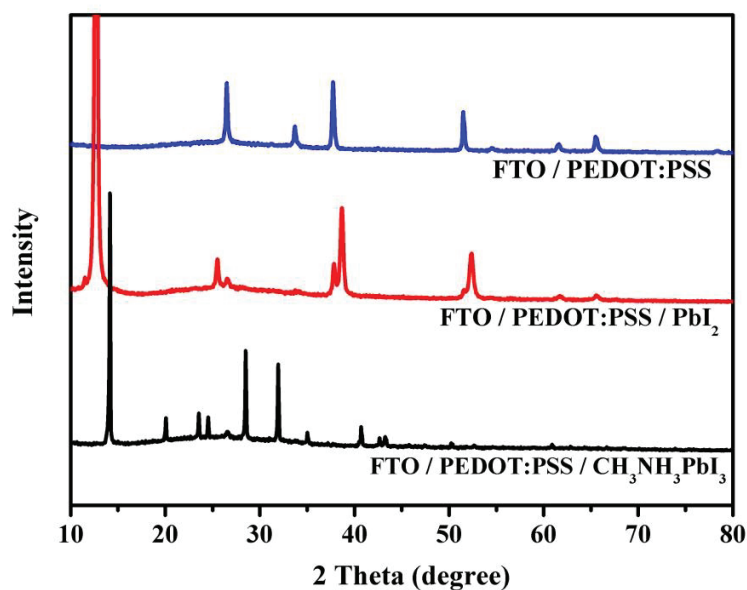

Fig. S12. X-ray diffraction spectra of the FTO/PEDOT: PSS, FTO/PEDOT: PSS/PbI<sub>2</sub>, and FTO/PEDOT: PSS/CH<sub>3</sub>NH<sub>3</sub>PbI<sub>3</sub> on glass substrates.

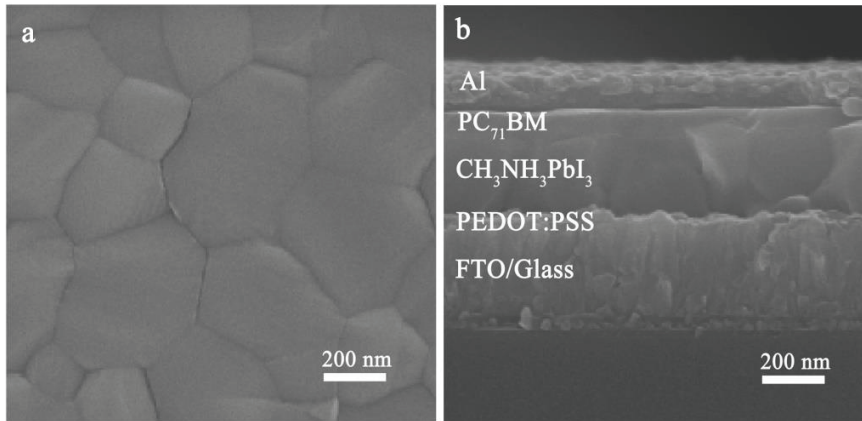

**Fig. S13. SEM images of  $\text{CH}_3\text{NH}_3\text{PbI}_3$  film and device configuration.** **a**, SEM images of  $\text{CH}_3\text{NH}_3\text{PbI}_3$  film on FTO/PEDOT:PSS substrate. **b**, Cross-sectional SEM images of the device configuration with  $\text{PC}_{71}\text{BM}$  isomers ( $\alpha:\beta_1:\beta_2=17:1:2$ ) as electron conductors.

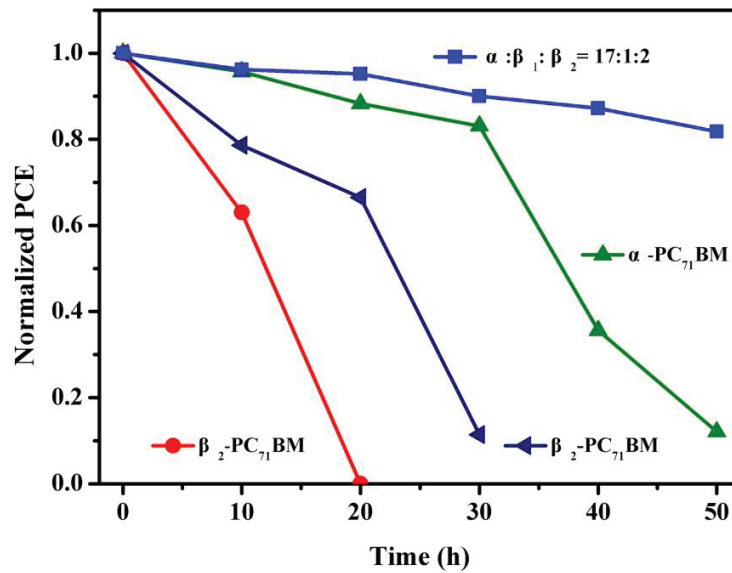

**Fig. S14. Stability of the perovskite solar cells at the typical  $\text{PC}_{71}\text{BM}$  isomers formulations.**



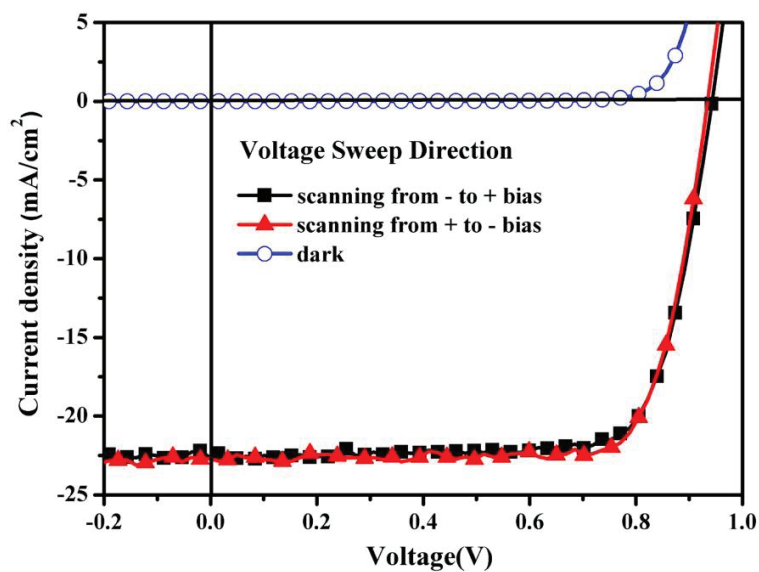

Fig. S15.  $J$ - $V$  curves of devices using PC<sub>71</sub>BM isomers ( $\alpha$ : $\beta_1$ : $\beta_2$ =17:1:2) as electron acceptor measured at different sweep directions under AM 1.5 simulated illumination with a scan rate of 0.1 Vs<sup>-1</sup>.

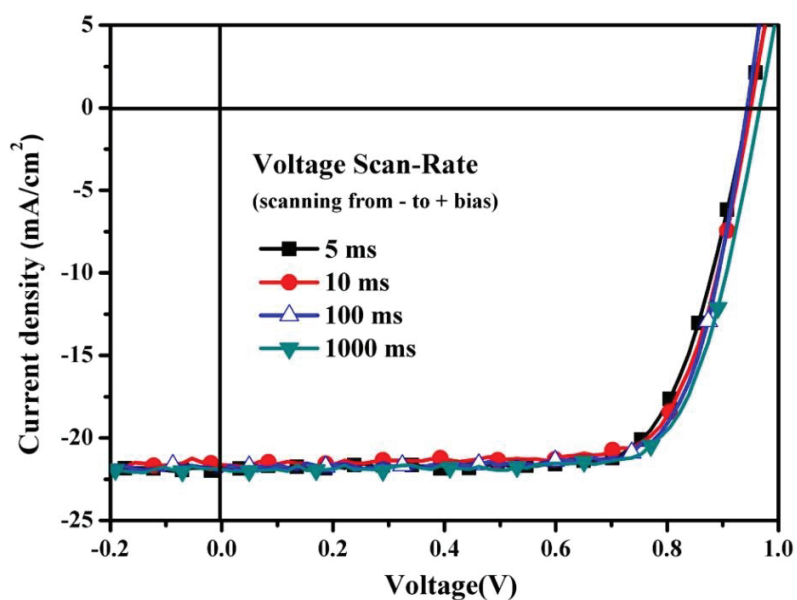

Fig. S16.  $J$ - $V$  curves of devices using PC<sub>71</sub>BM isomers ( $\alpha$ : $\beta_1$ : $\beta_2$ =17:1:2) as electron acceptor measured at selected voltage scan rates in delay time (ms).

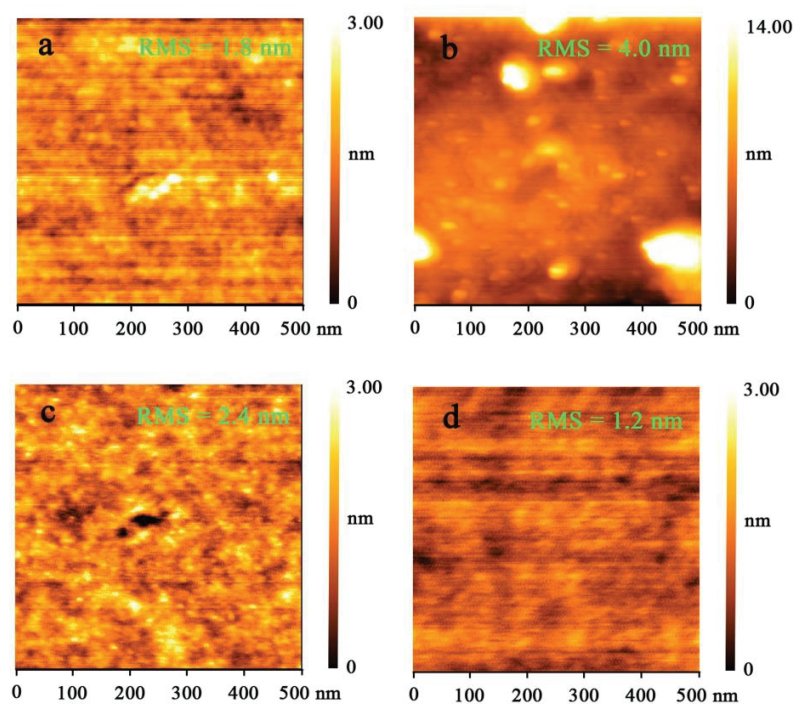

**Fig. S17.** AFM images of the films of  $\alpha$ -PC<sub>71</sub>BM-only film (a),  $\beta_1$ -PC<sub>71</sub>BM-only film (b),  $\beta_2$ -PC<sub>71</sub>BM-only film (c), and  $\alpha$ : $\beta_1$ : $\beta_2$ =17:1:2 film (d). The films were prepared by spin-coating the chlorobenzene solutions of samples onto fresh cleaved mica substrates.

**Table S1. Half-wave potentials of the reduction process, onset reduction potentials and LUMO energy levels of  $\alpha$ -PC<sub>71</sub>BM,  $\beta_1$ -PC<sub>71</sub>BM, and  $\beta_2$ -PC<sub>71</sub>BM.**

| <b>Compound</b>                | <b>E<sub>1</sub> (V)</b> | <b>E<sub>2</sub> (V)</b> | <b>E<sub>red</sub><sup>on</sup> (V)</b> | <b>LUMO (eV)</b> |
|--------------------------------|--------------------------|--------------------------|-----------------------------------------|------------------|
| $\alpha$ -PC <sub>71</sub> BM  | -0.992                   | -1.404                   | -0.835                                  | -3.87            |
| $\beta_1$ -PC <sub>71</sub> BM | -1.074                   | -1.506                   | -0.842                                  | -3.87            |
| $\beta_2$ -PC <sub>71</sub> BM | -1.027                   | -1.473                   | -0.827                                  | -3.88            |

**Table S2. The best photovoltaic performances of devices with different compositions of PC<sub>71</sub>BM isomers as the electron acceptors.**

| $\alpha:\beta_1:\beta_2$ | $V_{oc}$ (V) | $J_{sc}$ (mA/cm <sup>2</sup> ) | FF (%) | PCE (%) |
|--------------------------|--------------|--------------------------------|--------|---------|
| 80:11:9 (commercial)     | 0.958        | 22.98                          | 69.20  | 15.23   |
| 1:0:0                    | 0.870        | 19.70                          | 54.72  | 9.37    |
| 0:1:0                    | 0.797        | 1.676                          | 28.70  | 0.38    |
| 0:0:1                    | 0.785        | 11.57                          | 40.70  | 3.70    |
| 1:1:1                    | 0.765        | 18.70                          | 54.75  | 7.83    |
| 1:1:0                    | 0.904        | 13.84                          | 38.11  | 4.76    |
| 0:1:1                    | 0.918        | 9.493                          | 48.12  | 4.19    |
| 1:0:1                    | 0.944        | 20.82                          | 49.82  | 9.79    |
| 4:1:1                    | 0.945        | 20.64                          | 53.89  | 10.52   |
| 1:4:1                    | 0.936        | 6.770                          | 54.16  | 3.43    |
| 1:1:4                    | 0.923        | 8.180                          | 42.65  | 3.22    |
| 5:5:2                    | 0.915        | 16.47                          | 47.30  | 7.12    |
| 2:5:5                    | 0.891        | 8.492                          | 54.74  | 4.14    |
| 5:2:5                    | 0.944        | 19.29                          | 46.65  | 8.50    |
| 7:1:1                    | 0.956        | 22.56                          | 69.89  | 15.07   |
| 16:1:1                   | 0.929        | 24.00                          | 71.67  | 15.98   |
| 17:2:1                   | 0.928        | 24.07                          | 73.27  | 16.37   |
| 17:1:2                   | 0.952        | 23.37                          | 78.96  | 17.56   |
